# Supplementary material for: Systematic Review of Real-World Studies Evaluating Characteristics Associated With or Programs Designed to Facilitate Outpatient Management of Deep Vein Thrombosis
Source: PubMed Central journal article supplement — Clin Appl Thromb Hemost. 2018 Nov 14;24(9 Suppl):301S–313S. doi: 10.1177/1076029618811082 (PMC6714833; doi:10.1177/1076029618811082), 2018-11-14
Supplement: Supplementary_material_(2)_(1).pdf [file Supplementary_material_%282%29_%281%29.pdf]

## Supplementary material

### Appendix A. Search Strategy

| Step | Search Terms                                          |
|------|-------------------------------------------------------|
| 1.   | venous thromboembolism                                |
| 2.   | venous thrombosis                                     |
| 3.   | VTE                                                   |
| 4.   | DVT                                                   |
| 5.   | deep vein thrombosis                                  |
| 6.   | deep-vein thrombosis                                  |
| 7.   | deep venous thrombosis                                |
| 8.   | deep-venous thrombosis                                |
| 9.   | deep vein thromboses                                  |
| 10.  | deep venous thromboses                                |
| 11.  | venous thromboses                                     |
| 12.  | 1 or 2 or 3 or 4 or 5 or 6 or 7 or 8 or 9 or 10 or 11 |

|     |                                                                  |
|-----|------------------------------------------------------------------|
| 13. | Home                                                             |
| 14. | Outpatient                                                       |
| 15. | outpatient*                                                      |
| 16. | out-patient*                                                     |
| 17. | patient discharge                                                |
| 18. | ambulatory treatment                                             |
| 19. | ambulant treatment                                               |
| 20. | "early discharge"                                                |
| 21. | 13 or 14 or 15 or 16 or 17 or 18 or 19 or 20                     |
| 22. | 12 and 21                                                        |
| 23. | limit 22 to (english language and humans and yr="2012 -Current") |

## Appendix B. Adapted Version of the AXIS Tool Used in Validity Assessment<sup>a</sup>

| Items |                                                                                                                                                                               |  |
|-------|-------------------------------------------------------------------------------------------------------------------------------------------------------------------------------|--|
| 1     | Was the study design appropriate for the stated aim(s)?                                                                                                                       |  |
| 2     | Was the sample size justified?                                                                                                                                                |  |
| 3     | Was the sample frame taken from an appropriate population base so that it closely represented the target/reference population under investigation?                            |  |
| 4     | Was the selection process likely to select subjects/participants that were representative of the target/reference population under investigation?                             |  |
| 5     | Were the risk factor and outcome variables measured appropriate to the aims of the study?                                                                                     |  |
| 6     | Were the risk factor and outcome variables measured in a way that would minimize misclassification bias (e.g., did the study utilize clinical rather than claims-based data)? |  |
| 7     | Were the authors' discussions and conclusions justified by the results?                                                                                                       |  |
| 8     | Was ethical approval or consent of participants obtained?                                                                                                                     |  |

<sup>a</sup> Each study can be given a maximum of one star for each of the eight items.

|                                                        | Chu 2017 | Douce 2017 | Kabrhel 2017 | Mansour 2017 | Mausbach 2017 | Tichter 2017 | Barrett 2016 | Lamb 2016 | Singer 2016 | Stein 2016 | Beam 2015 | Dentali 2015 | Padron 2015 | Rosa-Salazar 2015 | Stein 2015 | Trujillo-Santos 2015 | Falconieri 2014 | Lozano 2014 | Misky 2014 | Davis 2013 | Gibson-Chambers 2013 |    |
|--------------------------------------------------------|----------|------------|--------------|--------------|---------------|--------------|--------------|-----------|-------------|------------|-----------|--------------|-------------|-------------------|------------|----------------------|-----------------|-------------|------------|------------|----------------------|----|
| 1. Study design appropriate for aim(s)?                | *        | *          | *            | *            | *             | *            | *            | *         | *           | *          | *         | *            | *           | *                 | *          | *                    | *               | *           | *          | *          | *                    | *  |
| 2. Sample size justified?                              | *        | *          | *            | *            | *             | *            | *            | *         | *           | *          | *         | *            | *           | *                 | *          | *                    | *               | *           | *          | *          | *                    | *  |
| 3. Sample from an appropriate population base?         | *        | *          | *            | *            | *             | *            | *            | *         | *           | *          | *         | *            | *           | *                 | *          | *                    | *               | *           | *          | *          | *                    | *  |
| 4. Selection process select representative population? | *        | *          | *            | *            | *             | *            | *            | *         | *           | *          | *         | *            | *           | *                 | *          | *                    | *               | *           | *          | *          | *                    | *  |
| 5. Variables measured appropriate to aims of study?    | *        | *          | *            | *            | *             | *            | *            | *         | *           | -          | *         | *            | *           | *                 | -          | *                    | *               | *           | *          | *          | *                    | -  |
| 6. Misclassification bias minimized?                   | *        | *          | *            | -            | *             | -            | *            | -         | -           | -          | *         | *            | *           | *                 | *          | *                    | *               | *           | *          | *          | *                    | -  |
| 7. Discussions/ conclusions justified given results?   | *        | *          | *            | *            | *             | *            | *            | *         | *           | *          | *         | *            | *           | *                 | *          | *                    | *               | *           | *          | *          | *                    | *  |
| 8. Ethical approval or consent obtained?               | NR       | *          | *            | NR           | NR            | NR           | NR           | NR        | *           | NR         | *         | *            | *           | *                 | *          | *                    | *               | *           | *          | *          | *                    | NR |

**Supplemental Table 1. Validity Assessment Results**

Validity was assessed using a modified version of the AXIS tool. Studies were awarded a star or noted to have a minus sign for each item if they were deemed to have high or low quality, respectively.

NR=not reported

| Author, year<br>(N=)       | Country | Primary<br>Anticoagulant<br>Upon<br>Discharge | Age, Mean±SD   |                | Clinical Characteristics  |                    |                   |
|----------------------------|---------|-----------------------------------------------|----------------|----------------|---------------------------|--------------------|-------------------|
|                            |         |                                               | Outpatients    | Inpatients     | Characteristic            | Outpatients<br>(%) | Inpatients<br>(%) |
| Douce 2017<br>(N=141)      | US      | NR                                            | 67<br>(median) | 70<br>(median) | Coronary artery disease   | 21.0               | 23.0              |
|                            |         |                                               |                |                | Cancer                    | 25.0               | 18.0              |
|                            |         |                                               |                |                | Provoked DVT              | 26.0               | 41.0              |
|                            |         |                                               |                |                | Proximal DVT              | 72.0               | 90.0              |
|                            |         |                                               |                |                | Smoking                   | 44.0               | 52.0              |
|                            |         |                                               |                |                | Chronic kidney disease    | 13.0               | 19.0              |
|                            |         |                                               |                |                | Hypertension              | 54.0               | 69.0              |
|                            |         |                                               |                |                | Diabetes                  | 11.0               | 22.0              |
|                            |         |                                               |                |                | Hyperlipidemia            | 56.0               | 54.0              |
|                            |         |                                               |                |                | Obesity                   | 51.0               | 47.0              |
| Mansour 2017<br>(N=23,015) | Canada  | NR                                            | 56.3±NR        | 68.2±NR        | Myocardial infarction     | 2.7                | 5.6               |
|                            |         |                                               |                |                | Congestive heart failure  | 3.4                | 9.7               |
|                            |         |                                               |                |                | Cancer                    | 12.8               | 25.9              |
|                            |         |                                               |                |                | PVD                       | 2.3                | 5.2               |
|                            |         |                                               |                |                | Cerebrovascular accident  | 2.8                | 6.1               |
|                            |         |                                               |                |                | COPD                      | 7.4                | 16.2              |
|                            |         |                                               |                |                | Peptic ulcer disease      | 0.9                | 2.7               |
|                            |         |                                               |                |                | Liver disease             | 1.2                | 3.2               |
|                            |         |                                               |                |                | Diabetes                  | 9.8                | 18.0              |
|                            |         |                                               |                |                | Renal disease             | 2.4                | 9.0               |
|                            |         |                                               |                |                | Anemia                    | 5.2                | 18.5              |
|                            |         |                                               |                |                | Thrombocytopenia          | 0.6                | 2.6               |
|                            |         |                                               |                |                | Hypertension              | 14.5               | 31.7              |
|                            |         |                                               |                |                | Neurological disease      | 2.6                | 6.4               |
|                            |         |                                               |                |                | Dementia                  | 1.1                | 5.5               |
|                            |         |                                               |                |                | Connective tissue disease | 1.3                | 3.1               |
|                            |         |                                               |                |                | Hemiplegia                | 0.5                | 2.7               |
|                            |         |                                               |                |                | AIDS                      | 0.1                | 0.2               |
| Valvular disease           | 1.5     | 2.5                                           |                |                |                           |                    |                   |
| Falls                      | 9.2     | 13.0                                          |                |                |                           |                    |                   |

|                          |        |                 |             |             |                              |      |      |
|--------------------------|--------|-----------------|-------------|-------------|------------------------------|------|------|
|                          |        |                 |             |             | Alcoholism                   | 1.8  | 3.6  |
|                          |        |                 |             |             | Hypothyroidism               | 1.9  | 6.2  |
|                          |        |                 |             |             | Provoked DVT                 | 20.3 | 51.0 |
|                          |        |                 |             |             | Postoperative                | 9.8  | 11.7 |
|                          |        |                 |             |             | Recent hospitalization       | 16.4 | 68.1 |
| Mausbach 2017 (N=236)    | Israel | LMWH and/or VKA | 68 (median) | 73 (median) | Cardiac disease              | 20.2 | 31.3 |
|                          |        |                 |             |             | Lung disease                 | 12.4 | 16.3 |
|                          |        |                 |             |             | Cancer                       | 16.9 | 18.4 |
|                          |        |                 |             |             | Kidney disease               | 12.4 | 17.7 |
|                          |        |                 |             |             | Diabetes mellitus            | 20.4 | 24.7 |
|                          |        |                 |             |             | Previous VTE                 | 19.1 | 20.4 |
|                          |        |                 |             |             | Previous stroke              | 5.6  | 16.3 |
|                          |        |                 |             |             | Smoking                      | 23.6 | 24.5 |
|                          |        |                 |             |             | Previous bleeding            | 4.5  | 9.5  |
|                          |        |                 |             |             | Chronic liver disease        | 1.1  | 1.4  |
|                          |        |                 |             |             | Clotting abnormality         | 3.4  | 5.6  |
|                          |        |                 |             |             | Postoperative                | 11.2 | 6.1  |
|                          |        |                 |             |             | Drug abuse                   | 0    | 0.7  |
|                          |        |                 |             |             | Tichter 2017 (N=690,000)     | US   | NR   |
| Lamb 2016 (N=1,146,469)  | US     | NR              | NR          |             | NR                           |      |      |
| Singer 2016 (N=652,000)  | US     | NR              | 58±NR       |             | NR                           |      |      |
| Stein 2016 (N=2,671,452) | US     | NR              | NR          |             | Any comorbidity <sup>a</sup> | 26.0 | 72.5 |
| Dentali 2015 (N=1,452)   | Italy  | LMWH and/or VKA | 56±17       | 65±18       | Chronic heart failure        | 3.3  | 5.3  |
|                          |        |                 |             |             | Chronic lung disease         | 4.7  | 3.1  |
|                          |        |                 |             |             | Cancer                       | 22.0 | 19.6 |
|                          |        |                 |             |             | Decreased renal function     | 14.2 | 33.5 |
|                          |        |                 |             |             | Anemia                       | 21.6 | 38.4 |
|                          |        |                 |             |             | Recent major bleeding        | 0.67 | 0.93 |
|                          |        |                 |             |             | Postoperative                | 5.2  | 6.2  |
|                          |        |                 |             |             | Immobility                   | 10.0 | 12.2 |
|                          |        |                 |             |             | Estrogen therapy             | 9.0  | 4.3  |
| Pregnancy                | 2.9    | 1.8             |             |             |                              |      |      |

|                                                |                            |                    |       |       |                              |      |      |
|------------------------------------------------|----------------------------|--------------------|-------|-------|------------------------------|------|------|
|                                                |                            |                    |       |       | Long-term travel             | 2.4  | 1.8  |
| Rosa-Salazar<br>2015 <sup>b</sup><br>(N=1,135) | International <sup>c</sup> | LMWH and/or<br>VKA | 52±18 | 54±19 | Chronic heart failure        | 2.7  | 7.1  |
|                                                |                            |                    |       |       | Chronic lung disease         | 5.6  | 7.4  |
|                                                |                            |                    |       |       | Cancer                       | 43.0 | 36.0 |
|                                                |                            |                    |       |       | Recent major bleeding        | 0.6  | 1.1  |
|                                                |                            |                    |       |       | Anemia                       | 36.0 | 37.0 |
|                                                |                            |                    |       |       | Abnormal platelet count      | 6.2  | 7.1  |
|                                                |                            |                    |       |       | Immobility                   | 4.7  | 6.9  |
|                                                |                            |                    |       |       | Postoperative                | 9.1  | 9.8  |
|                                                |                            |                    |       |       | Prior VTE                    | 8.3  | 9.4  |
| Stein 2015<br>(N=96)                           | US                         | NR                 | 59±16 | 68±18 | Any comorbidity <sup>d</sup> | 0    | 65.9 |
| Trujillo-Santos<br>2015<br>(N=15,280)          | International <sup>c</sup> | LMWH and/or<br>VKA | 61±17 | 66±18 | Chronic heart failure        | 3.3  | 4.6  |
|                                                |                            |                    |       |       | Chronic lung disease         | 7.0  | 9.4  |
|                                                |                            |                    |       |       | Cancer                       | 12.0 | 12.0 |
|                                                |                            |                    |       |       | Recent major bleeding        | 0.5  | 1.3  |
|                                                |                            |                    |       |       | Anemia                       | 24.0 | 35.0 |
|                                                |                            |                    |       |       | Platelet count               | 3.7  | 5.6  |
|                                                |                            |                    |       |       | Postoperative                | 8.6  | 9.0  |
|                                                |                            |                    |       |       | Immobility                   | 20.0 | 25.0 |
|                                                |                            |                    |       |       | Prior VTE                    | 17.0 | 17.0 |
| Lozano 2014<br>(N=13,493)                      | International <sup>c</sup> | LMWH and/or<br>VKA | 62±17 | 66±18 | Chronic heart failure        | 3.4  | 4.3  |
|                                                |                            |                    |       |       | Chronic lung disease         | 6.8  | 9.4  |
|                                                |                            |                    |       |       | Cancer                       | 17.0 | 20.0 |
|                                                |                            |                    |       |       | Anemia                       | 24.0 | 34.0 |
|                                                |                            |                    |       |       | Recent major bleeding        | 0.5  | 1.2  |
|                                                |                            |                    |       |       | Postoperative                | 8.5  | 8.9  |
|                                                |                            |                    |       |       | Immobility                   | 20.0 | 26.0 |
|                                                |                            |                    |       |       | Prior VTE                    | 16.0 | 17.0 |
| Gibson-<br>Chambers<br>2013<br>(N=845,000)     | US                         | NR                 |       | NR    |                              | NR   |      |

**Supplemental Table 2. Clinical Characteristics among Patients with Deep Vein Thrombosis Treated as Outpatients versus Inpatients**

DVT= deep vein thrombosis; COPD= chronic obstructive pulmonary disease; LMWH= low-molecular weight heparin; NR= not reported; PVD= peripheral vascular disease; SD= standard deviation; US= United States; VKA= vitamin K antagonist; VTE= venous thromboembolism

<sup>a</sup>Defined by the Charlson Comorbidity Index

<sup>b</sup>All included patients with deep vein thrombosis in the upper extremity

<sup>c</sup>Countries include Spain, France, Italy, Israel, Germany, Switzerland, Republic of Macedonia and Brazil

<sup>d</sup>The most common comorbid conditions were diabetes and chronic obstructive pulmonary disease. Other comorbidities included dementia, cancer and cerebral vascular disease
